# Supplementary material
Source: PubMed Central journal article supplement (PMC3123024)

**Figure S1. CTL activation and HLH-like phenotype in LCMV-infected C57BL/6J, *Unc13d<sup>jinx/jinx</sup>*, and *Unc13d<sup>jinx/jinx</sup>; Itgb2<sup>Joker/Joker</sup>* mice**

7 days (A) and 12 days (B) following infection with the Armstrong strain of LCMV, splenocytes from mutant and wild type mice were stimulated *in vitro* for 5 hours in presence of the LCMV-derived GP33 peptide and brefeldin A, then stained for CD8 $\alpha$ , CD3 $\epsilon$  and intracellular IFN $\gamma$ . Graphs represent percentages of LCMV GP33-specific IFN $\gamma$ <sup>+</sup>CD8<sup>+</sup> T cells. Percentages of CD3 $\epsilon$ <sup>+</sup>CD8<sup>+</sup> T cells in spleens of mutant and wild type mice (C), spontaneous production of IFN $\gamma$  among CD8<sup>+</sup> T cells as detected after a 5 hour incubation with brefeldin A (D), and surface expression of CD69 on CD8<sup>+</sup> T cells (E) were measured at the indicated times after infection with LCMV. Blood samples were collected on day 12; hematocrit (F), lymphocytes (G), and neutrophils (H) were enumerated. Bars in graphs show the means. Dots represent individual mice. *jinx*, *Unc13d<sup>jinx/jinx</sup>* mice; *jinx*; *Joker*, *Unc13d<sup>jinx/jinx</sup>; Itgb2<sup>Joker/Joker</sup>* double mutants.

**Figure S2. Appearance of HLH-like disease in *Unc13d<sup>jinx/jinx</sup>*, *Unc13d<sup>jinx/jinx</sup>; Tnf PanR1/PanR1*, *Unc13d<sup>jinx/jinx</sup>; Ifngr<sup>-/-</sup>* and wild type mice 12 days after LCMV infection**

(A) Photographs of spleens of mutant and wild type mice. Spleen weights in gram are indicated ( $\pm$  SEM);  $n \geq 3$  per group of infected mice. Percentages of CD8<sup>+</sup> T cells (B) and activated macrophages (C) in spleens of mutant and wild type mice. One representative experiment of 4 is shown for the analysis of *Unc13d<sup>jinx/jinx</sup>; Ifngr<sup>-/-</sup>* (*jinx*; *Ifngr<sup>-/-</sup>*) CD8<sup>+</sup> T cells and macrophages. IFN $\gamma$  (D) and TNF (E) concentrations in the sera of mutant and wild type mice were determined by ELISA on day 12 post infection;  $n \geq 3$  per group of infected mice. Serum IFN $\gamma$  was also measured on day 7 post infection (F). Bars in graphs show the means. Dots represent individual mice. (G) LCMV viral titer as measured by FFU assay in kidneys of mice 12 days after LCMV infection. Means are indicated. *jinx*, *Unc13d<sup>jinx/jinx</sup>* mice; *jinx*; *Tnf PanR1*, *Unc13d<sup>jinx/jinx</sup>; Tnf PanR1/PanR1* mice; *jinx*; *Ifngr<sup>-/-</sup>*, *Unc13d<sup>jinx/jinx</sup>; Ifngr<sup>-/-</sup>*; *jinx*; *Myd88<sup>poc/poc</sup>*, *Unc13d<sup>jinx/jinx</sup>; Myd88<sup>poc/poc</sup>* mice. nd, non-detected. Error bars show standard error of the mean (SEM).

**Figure S3. Complete blood counts of wild type, *Unc13d<sup>jinx/jinx</sup>*, and *Unc13d<sup>jinx/jinx</sup>; Myd88<sup>poc/poc</sup>* mice**

Percentage of hematocrit (A), amount of hemoglobin (B), and absolute numbers of lymphocytes (C), neutrophils (D) and monocytes (E) enumerated in blood of wild type and mutant mice 12 days after LCMV infection. Representative data of 3 independent experiments are shown;  $n = 5$  per group. *jinx*, *Unc13d<sup>jinx/jinx</sup>* mice; *jinx*; *Myd88<sup>poc</sup>*, *Unc13d<sup>jinx/jinx</sup>; Myd88<sup>poc/poc</sup>* mice. Error bars show standard error of the mean (SEM).

**Figure S4. Disruption of IL-1R1-signaling does not rescue HLH-like disease**

Mice were injected with LCMV and spleens were harvest 12 days later. (A) Mean of fluorescence intensity of CD86 expression on macrophages from wild type, *jinx* (*Unc13d<sup>jinx/jinx</sup>*) and *jinx*; *Il1r1<sup>-/-</sup>* (*Unc13d<sup>jinx/jinx</sup>; B6.129S7-Il1r1<sup>tm1Imx</sup>/J*) mice. Cells were stained as in Figure 2. Splenocytes from LCMV-infected mice were left unstimulated for 5 hours in presence of brefeldin A, then stained for CD8 $\alpha$  and intracellular IFN $\gamma$  expression. Graphs report the percentages of CD8<sup>+</sup> T cells (B) and the percentages of IFN $\gamma$ <sup>+</sup>CD8<sup>+</sup> T cells (C). Serum IL-6 was measured by ELISA 7 days post infection (D). *jinx*, *Unc13d<sup>jinx/jinx</sup>* mice; *jinx*; *Ifng<sup>-/-</sup>*, *Unc13d<sup>jinx/jinx</sup>; Ifngr<sup>-/-</sup>*; *jinx*; *Myd88<sup>poc</sup>*, *Unc13d<sup>jinx/jinx</sup>; Myd88<sup>poc/poc</sup>* mice. Bars in graphs show the means. Dots represent individual mice.

Figure S1

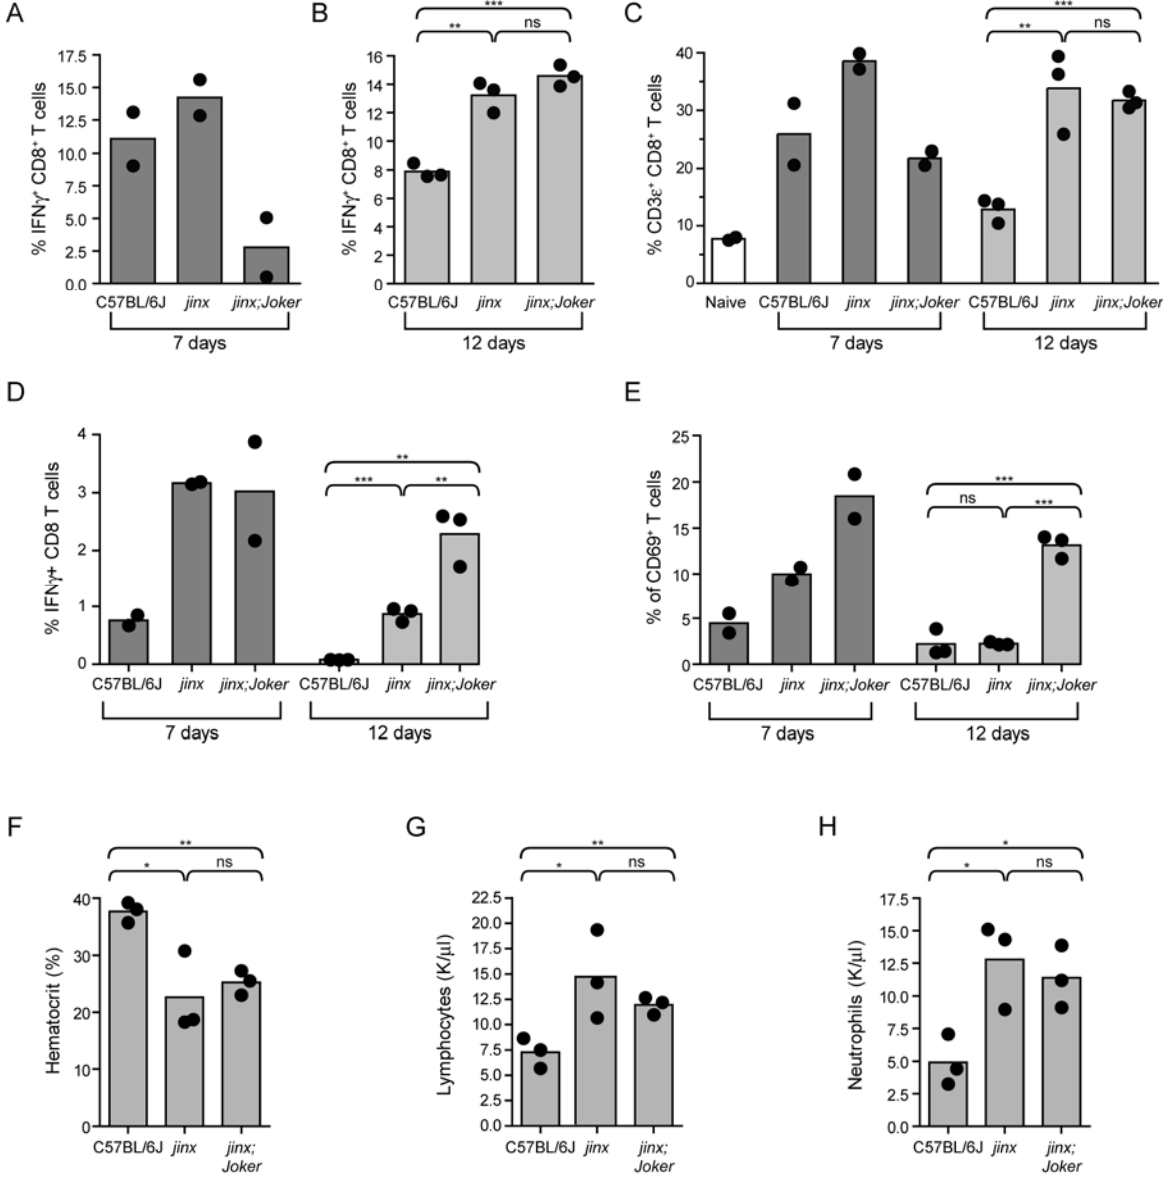



Figure S3

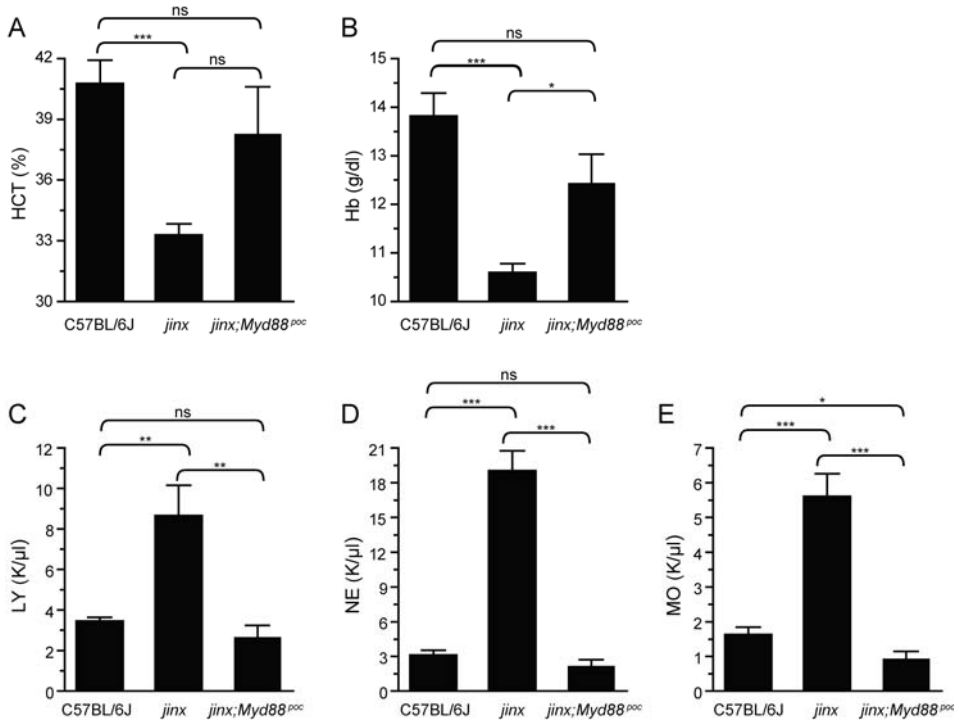

Figure S4

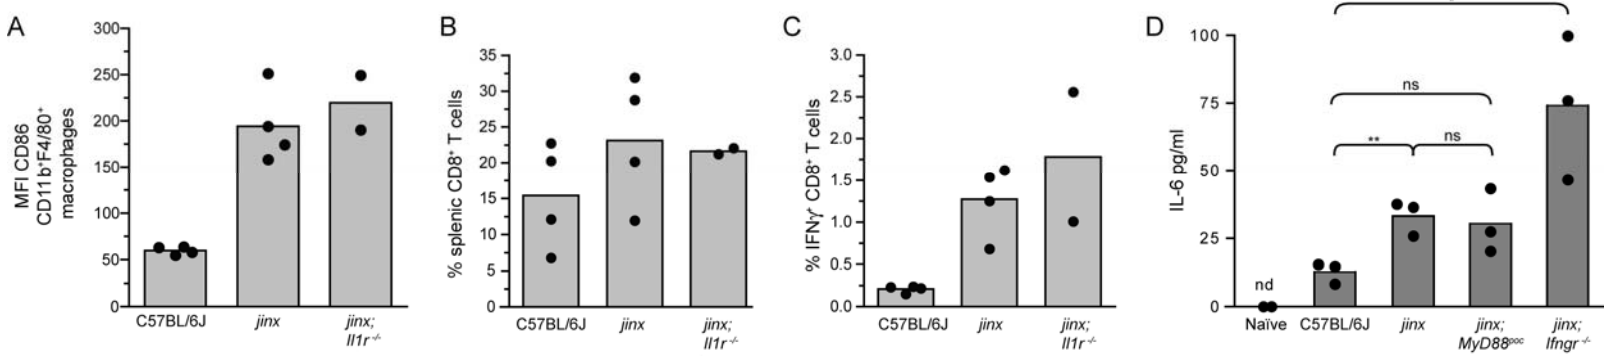

Supplement: supp_blood-2011-01-329607_Document1.pdf [file supp_blood-2011-01-329607_Document1.pdf]
